# Supplementary material for: 3D Bioprinted Vascularized Tumour for Drug Testing
Source: PubMed Central journal article supplement (PMC7215771; doi:10.3390/ijms21082993), 2020-04-23
Supplement: ijms-21-02993-s001.pdf [file ijms-21-02993-s001.pdf]

## Supplementary Information

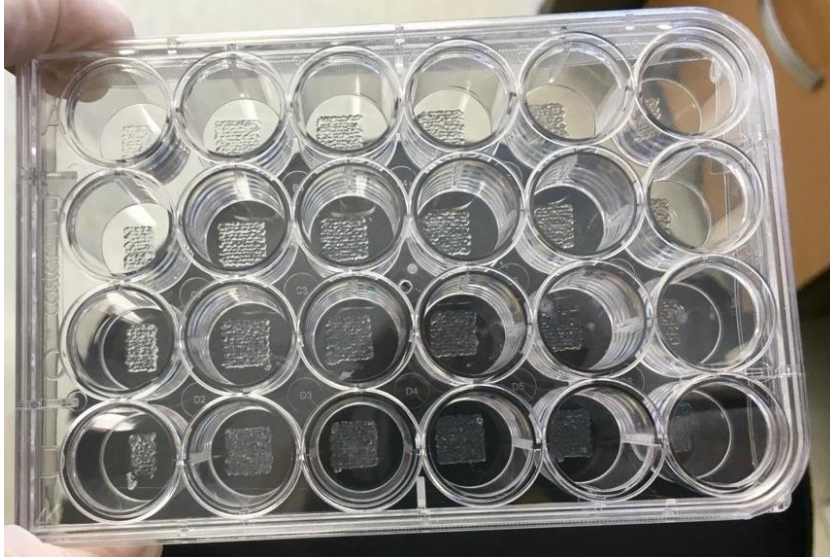

**Figure S1.** Bioprinted vascularized tissue onto conventional 24 well plate.

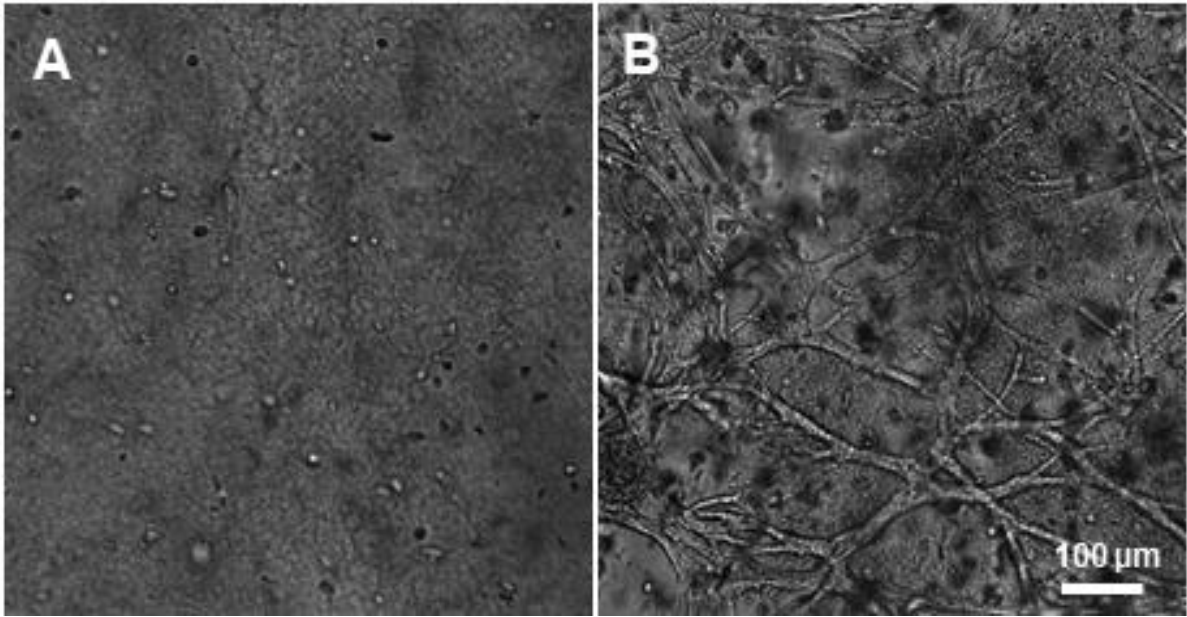

**Figure S2.** HUVEC forming vascular network only presence of lung fibroblasts (**A**) Optical image of HUVEC in bioprinted gel/alg/fib without lung fibroblast on day 7. (**B**) Optical image of HUVEC forming vascular network in bioprinted gel/alg/fib with lung fibroblast on day 7.

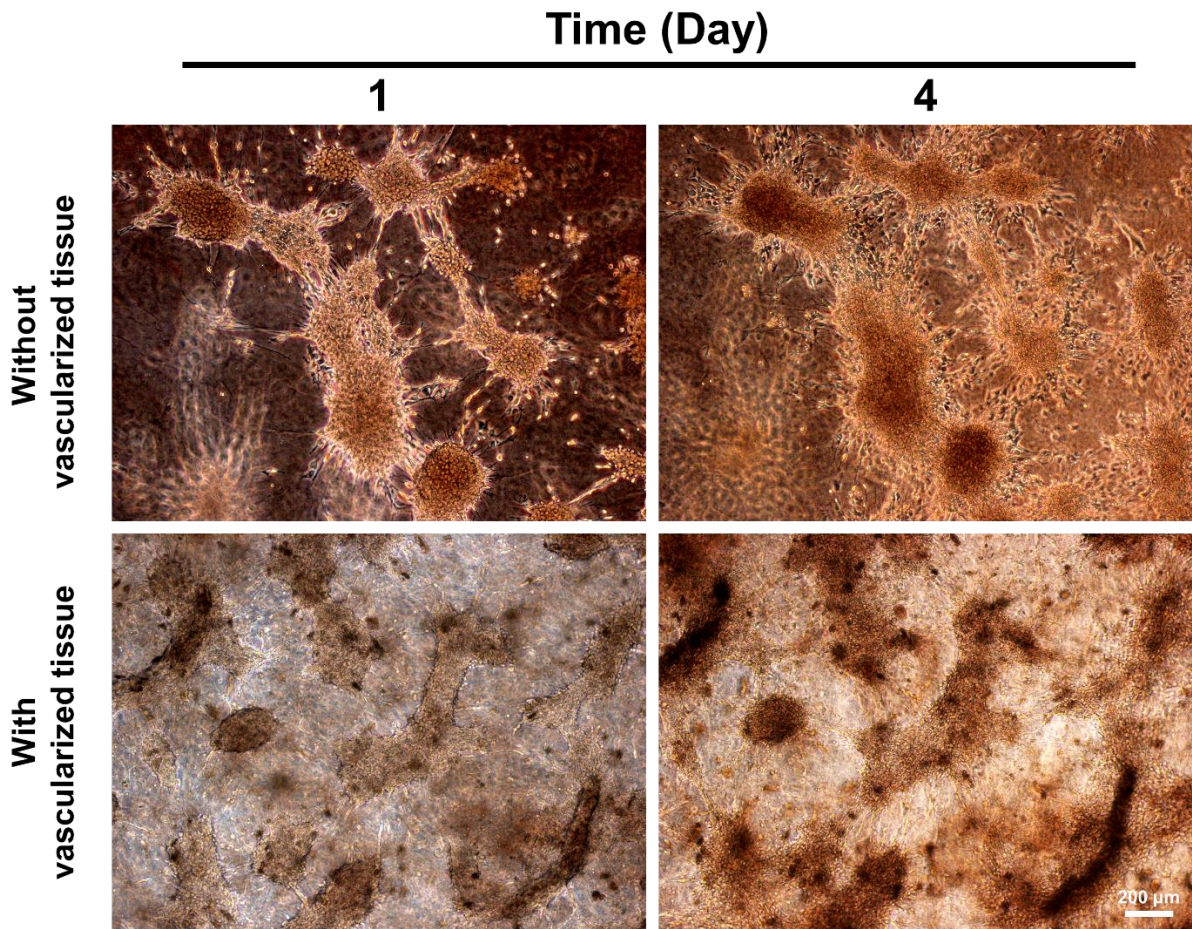

**Figure S3.** Optical image of U87 aggregated on bioprinted tissue with/without vascularization on day 1 and 4.

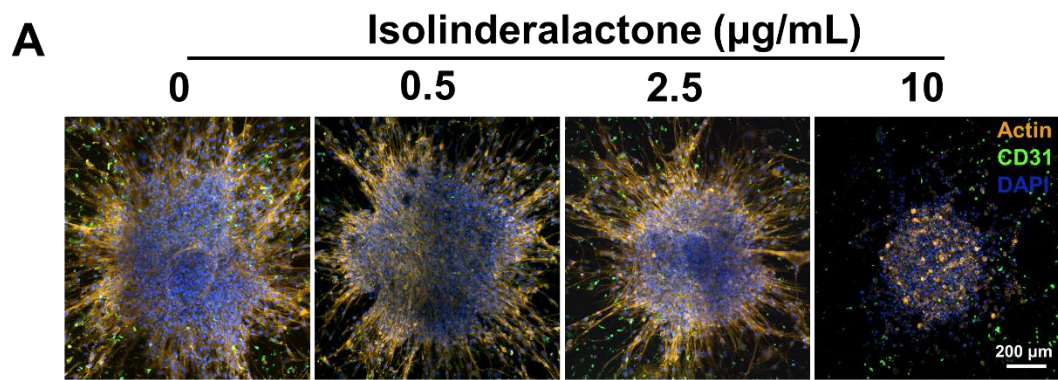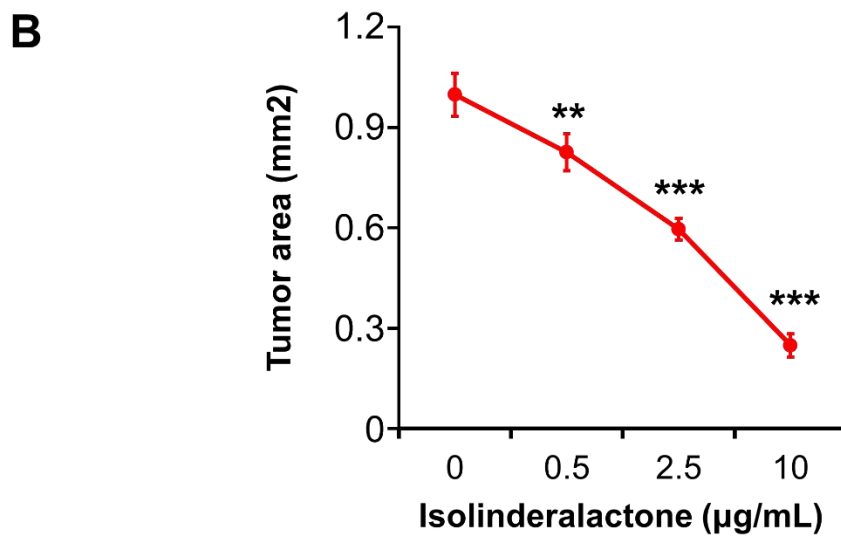

**Figure S4.** (A) Confocal image of U87 spheroid on vascularized tissue treated with different concentration (0, 0.5, 2.5, 10  $\mu\text{g/mL}$ ) of isolinderalactone. (B) Tumor area of U87 spheroid treated with different concentration of isolinderalactone. N = 4-5; Student's t-test, \*\* $p < 0.01$ , \*\*\* $p < 0.001$ .
